# Supplementary material for: Accelerated Wound Healing by Fibroblasts Differentiated from Human Embryonic Stem Cell-Derived Mesenchymal Stem Cells in a Pressure Ulcer Animal Model
Source: Hindawi journal article supplement (doi:10.1155/2018/4789568), 2018-12-30

### **Supplementary Figure Legends**

**Supplementary Figure 1.** Morphological images of fibroblast differentiation of human embryonic stem cell-derived mesenchymal stem cells (hESC-MSCs) upon stimulation with connective tissue growth factor (CTGF)

**Supplementary Figure 2.** Raw data of Figure 1A, 2C, 4A, 4C, 4D, 4E

**Supplementary Figure 3.** Images of CD31 staining taken from each group for statistical analysis

## Supplementary Figure 1

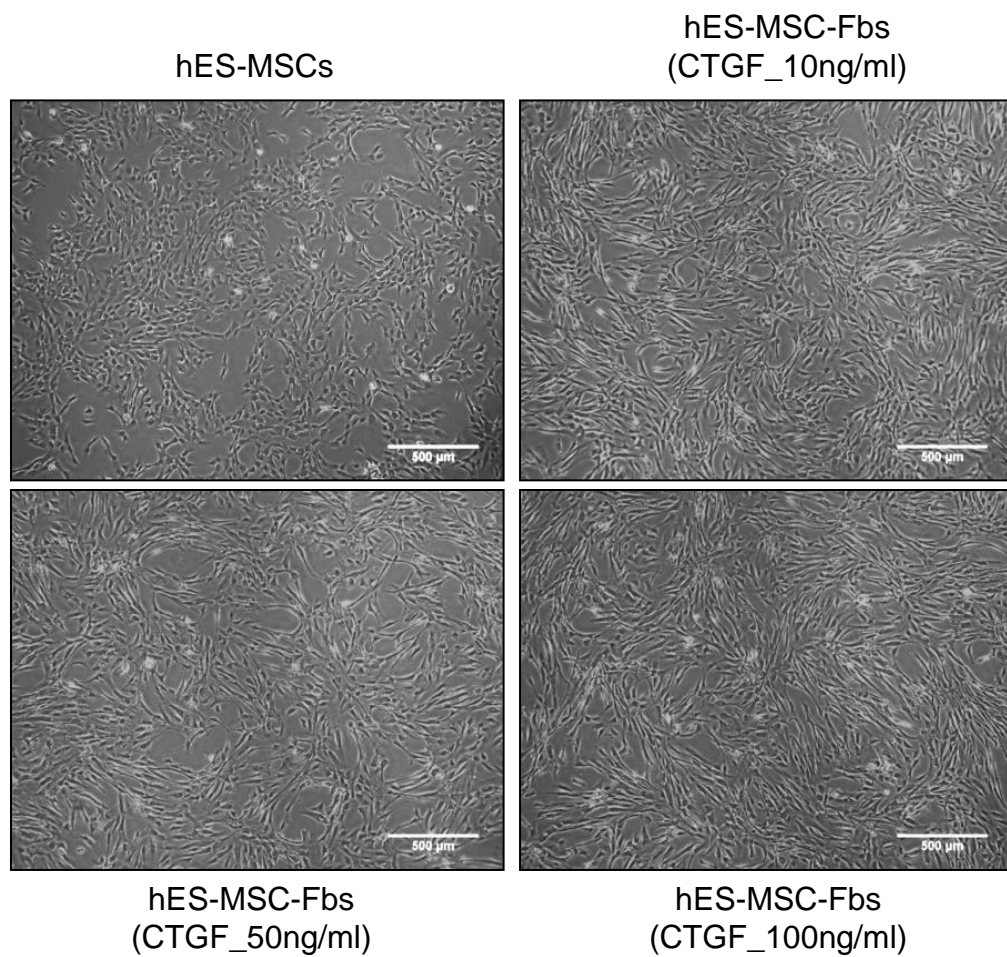

## Supplementary Figure 2

Fig1A

a

| Group            | $\beta$ -actin Ct | Col1 Ct | $2^{-(\text{Avg. } \beta\text{-actin Ct} - \text{Col1 Ct})}$ | Average    | Value    |
|------------------|-------------------|---------|--------------------------------------------------------------|------------|----------|
| NT (1)           | 13.74             | 15.16   | 0.397768242                                                  | 0.39915159 | 0.996534 |
| NT (2)           | 13.92             | 15.15   | 0.400534939                                                  |            | 1.003466 |
| CTGF10ng/ml (1)  | 13.86             | 13.5    | 1.296839555                                                  |            | 3.24899  |
| CTGF10ng/ml (2)  | 13.89             | 13.45   | 1.342572503                                                  |            | 3.363565 |
| CTGF50ng/ml (1)  | 13.78             | 13.49   | 1.235418637                                                  |            | 3.095111 |
| CTGF50ng/ml (2)  | 13.81             | 13.57   | 1.168777249                                                  |            | 2.928154 |
| CTGF100ng/ml (1) | 14.21             | 13.71   | 1.419123356                                                  |            | 3.555349 |
| CTGF100ng/ml (2) | 14.22             | 13.72   | 1.409320755                                                  |            | 3.530791 |
| NF (1)           | 13.89             | 14.66   | 0.641712949                                                  |            | 1.607692 |
| NF (2)           | 14.15             | 14.73   | 0.611320139                                                  |            | 1.531549 |

b

| Group            | $\beta$ -actin Ct | Col3 Ct | $2^{-(\text{Avg. } \beta\text{-actin Ct} - \text{Col3 Ct})}$ | Average     | Value    |
|------------------|-------------------|---------|--------------------------------------------------------------|-------------|----------|
| NT (1)           | 13.74             | 18.7    | 0.034196678                                                  | 0.034677378 | 0.986138 |
| NT (2)           | 13.92             | 18.66   | 0.035158078                                                  |             | 1.013862 |
| CTGF10ng/ml (1)  | 13.86             | 16.5    | 0.162104944                                                  |             | 4.67466  |
| CTGF10ng/ml (2)  | 13.89             | 16.5    | 0.162104944                                                  |             | 4.67466  |
| CTGF50ng/ml (1)  | 13.78             | 16.71   | 0.132585968                                                  |             | 3.823414 |
| CTGF50ng/ml (2)  | 13.81             | 16.72   | 0.131670129                                                  |             | 3.797004 |
| CTGF100ng/ml (1) | 14.21             | 17.09   | 0.136313467                                                  |             | 3.930905 |
| CTGF100ng/ml (2) | 14.22             | 17.11   | 0.134436799                                                  |             | 3.876787 |
| NF (1)           | 13.89             | 17.85   | 0.070316155                                                  |             | 2.027724 |
| NF (2)           | 14.15             | 17.81   | 0.072293011                                                  |             | 2.084731 |

c

| Group            | $\beta$ -actin Ct | FN Ct | $2^{-(\text{Avg. } \beta\text{-actin Ct} - \text{FN Ct})}$ | Average     | Value    |
|------------------|-------------------|-------|------------------------------------------------------------|-------------|----------|
| NT (1)           | 13.74             | 15.64 | 0.285190929                                                | 0.286182759 | 0.996534 |
| NT (2)           | 13.92             | 15.63 | 0.287174589                                                |             | 1.003466 |
| CTGF10ng/ml (1)  | 13.86             | 13.58 | 1.226884977                                                |             | 4.287068 |
| CTGF10ng/ml (2)  | 13.89             | 13.51 | 1.28788163                                                 |             | 4.500207 |
| CTGF50ng/ml (1)  | 13.78             | 13.47 | 1.252664439                                                |             | 4.377149 |
| CTGF50ng/ml (2)  | 13.81             | 13.48 | 1.244011653                                                |             | 4.346913 |
| CTGF100ng/ml (1) | 14.21             | 14.11 | 1.07549439                                                 |             | 3.758068 |
| CTGF100ng/ml (2) | 14.22             | 14.1  | 1.082975046                                                |             | 3.784208 |
| NF (1)           | 13.89             | 15.34 | 0.400534939                                                |             | 1.399577 |
| NF (2)           | 14.15             | 15.39 | 0.386891248                                                |             | 1.351903 |

d

| Group            | $\beta$ -actin Ct | FSP1 Ct | $2^{-(\text{Avg. } \beta\text{-actin Ct} - \text{FSP1 Ct})}$ | Average     | Value    |
|------------------|-------------------|---------|--------------------------------------------------------------|-------------|----------|
| NT (1)           | 13.74             | 22.48   | 0.002489376                                                  | 0.002489376 | 1        |
| NT (2)           | 13.92             | 22.48   | 0.002489376                                                  |             | 1        |
| CTGF10ng/ml (1)  | 13.86             | 20.49   | 0.01020203                                                   |             | 4.098227 |
| CTGF10ng/ml (2)  | 13.89             | 20.51   | 0.010061575                                                  |             | 4.041806 |
| CTGF50ng/ml (1)  | 13.78             | 20.33   | 0.010783729                                                  |             | 4.3319   |
| CTGF50ng/ml (2)  | 13.81             | 20.35   | 0.010635267                                                  |             | 4.272262 |
| CTGF100ng/ml (1) | 14.21             | 20.66   | 0.01147788                                                   |             | 4.610745 |
| CTGF100ng/ml (2) | 14.22             | 20.67   | 0.011398596                                                  |             | 4.578897 |
| NF (1)           | 13.89             | 18.74   | 0.03794359                                                   |             | 15.24221 |
| NF (2)           | 14.15             | 18.76   | 0.03742121                                                   |             | 15.03236 |

Fig2C

|              |    | 0day  | 4day  | 8day | 12day | 15day |
|--------------|----|-------|-------|------|-------|-------|
| PBS          | 1  | 1.81  | 9.79  |      |       |       |
|              | 2  | 8.88  | 8.82  |      |       |       |
|              | 3  | 9.65  | 9.25  |      |       |       |
|              | 4  | 9.65  |       | 8.3  |       |       |
|              | 5  | 9.78  |       | 7.37 |       |       |
|              | 6  | 9.87  |       | 6.26 |       |       |
|              | 7  | 9.78  |       | 8.3  | 6.77  |       |
|              | 8  | 9.52  |       | 8.49 | 6.26  |       |
|              | 9  | 10.12 |       | 9.16 | 5.82  |       |
|              | 10 | 10.17 |       | 7.61 | 3.74  |       |
|              | 11 | 10.12 |       | 7.6  | 2.66  |       |
|              | 12 | 9.82  |       | 6.83 | 4.69  |       |
|              | 13 | 9.86  |       | 8.39 | 4.3   |       |
|              | 14 | 8.88  |       | 6.89 | 2.85  | 0     |
|              | 15 | 10.13 |       | 8.23 | 6.14  | 5.04  |
|              | 16 | 10.14 |       | 9.42 | 4.59  | 3     |
|              | 17 | 9.77  |       | 6.83 | 5.73  | 5.42  |
|              | 18 | 9.58  |       | 7.28 | 2.76  | 1.58  |
|              | 19 | 9.86  |       | 4.77 | 2.24  | 0     |
| ES-MSC       | 20 | 9.78  | 10.36 |      |       |       |
|              | 21 | 9.85  | 10.19 |      |       |       |
|              | 22 | 9.38  | 9.32  |      |       |       |
|              | 23 | 10.85 |       | 7.48 |       |       |
|              | 24 | 9.85  |       | 6.17 |       |       |
|              | 25 | 9.77  |       | 8.47 |       |       |
|              | 26 | 8.9   |       | 7.26 | 3.56  |       |
|              | 27 | 9.78  |       | 7.99 | 6.15  |       |
|              | 28 | 10.51 |       | 7.77 | 5.12  |       |
|              | 29 | 10.15 |       | 7.61 | 2.86  |       |
|              | 30 | 9.53  |       | 7.91 | 5.55  |       |
|              | 31 | 9.8   |       | 6.17 | 1.69  | 0     |
|              | 32 | 9.81  |       | 5.85 | 5.06  | 2.42  |
|              | 33 | 10.42 |       | 7.03 | 6.18  | 1.3   |
|              | 34 | 10.07 |       | 8.76 | 4.86  | 4.33  |
|              | 35 | 10.64 |       | 7.37 | 3.19  | 0     |
| ES-MSC_Fibro | 36 | 8.71  | 9.7   |      |       |       |
|              | 37 | 9.2   | 8.14  |      |       |       |
|              | 38 | 9.85  | 9.39  |      |       |       |
|              | 39 | 10.01 |       | 8.52 |       |       |
|              | 40 | 9.45  |       | 4.75 |       |       |
|              | 41 | 10.53 |       | 9.44 |       |       |
|              | 42 | 9.24  |       | 7.63 | 4.25  |       |
|              | 43 | 9.82  |       | 7.66 | 3.17  |       |
|              | 44 | 10.65 |       | 8.82 | 6.36  |       |
|              | 45 | 9.41  |       | 7.01 | 3.46  |       |
|              | 46 | 8.75  |       | 6.62 | 3.47  |       |
|              | 47 | 11.02 |       | 8.33 | 2.38  | 0     |
|              | 48 | 10.26 |       | 6.94 | 2.53  | 1.09  |
|              | 49 | 9.8   |       | 7.63 | 4.36  | 0     |
|              | 50 | 10.07 |       | 7.34 | 6.11  | 0.86  |
|              | 51 | 9.02  |       | 7.8  | 4.93  | 0     |
|              | 52 | 10.92 |       | 8.92 | 4.89  | 1.39  |

Fig4A

a

| Group              | β-actin Ct | IL1β Ct | 2^(Avg. β-actin Ct - IL1β Ct) | Average  | Group Average | Value    |
|--------------------|------------|---------|-------------------------------|----------|---------------|----------|
| NT#1 (1)           | 19.78      | 26.6    | 0.009005                      | 0.009037 | 0.010481      | 0.859219 |
| NT#1 (2)           | 19.83      | 26.59   | 0.009068                      |          |               | 0.865196 |
| NT#2 (1)           | 18.7       | 25.13   | 0.011760                      | 0.011925 |               | 1.12202  |
| NT#2 (2)           | 18.74      | 25.09   | 0.012090                      |          |               | 1.153564 |
| PBS#1 (1)          | 16.04      | 18.27   | 0.219912                      | 0.221447 | 0.206323      | 20.98227 |
| PBS#1 (2)          | 16.13      | 18.25   | 0.222982                      | 0.138704 |               | 21.27517 |
| PBS#2 (1)          | 16.12      | 19.02   | 0.140146                      |          | 0.258818      | 13.37159 |
| PBS#2 (2)          | 16.25      | 19.05   | 0.137262                      | 0.258818 |               | 13.0964  |
| PBS#3 (1)          | 16.77      | 18.8    | 0.259715                      |          | 0.230975      | 24.7799  |
| PBS#3 (2)          | 16.94      | 18.81   | 0.257921                      | 24.60874 |               |          |
| ES-MSC#1 (1)       | 16.82      | 18.99   | 0.229251                      | 0.231660 | 0.230975      | 21.87329 |
| ES-MSC#1 (2)       | 16.91      | 18.96   | 0.234068                      | 0.205125 |               | 22.3329  |
| ES-MSC#2 (1)       | 16.79      | 18.95   | 0.221442                      |          | 0.256139      | 21.12821 |
| ES-MSC#2 (2)       | 16.76      | 19.18   | 0.188809                      | 0.256139 |               | 18.01465 |
| ES-MSC#3 (1)       | 16.49      | 19      | 0.256139                      |          | 0.108861      | 24.43875 |
| ES-MSC#3 (2)       | 17.58      | 19      | 0.256139                      | 24.43875 |               |          |
| ES-MSC-Fibro#1 (1) | 16.25      | 19.17   | 0.134904                      | 0.133515 | 0.108861      | 12.87141 |
| ES-MSC-Fibro#1 (2) | 16.31      | 19.2    | 0.132127                      | 0.084207 |               | 12.60652 |
| ES-MSC-Fibro#2 (1) | 17.91      | 21.53   | 0.083331                      |          | 0.084207      | 7.950792 |
| ES-MSC-Fibro#2 (2) | 17.98      | 21.5    | 0.085082                      | 8.117855 |               |          |

b

| Group              | β-actin Ct | IL6 Ct | 2^(Avg. β-actin Ct – IL6 Ct) | Average  | Group Average | Value    |
|--------------------|------------|--------|------------------------------|----------|---------------|----------|
| NT#1 (1)           | 19.78      | 30.22  | 0.000732                     | 0.000658 | 0.000458      | 1.598839 |
| NT#1 (2)           | 19.83      | 30.55  | 0.000583                     |          |               | 1.271935 |
| NT#2 (1)           | 18.7       | 30.8   | 0.000231                     | 0.000259 |               | 0.504185 |
| NT#2 (2)           | 18.74      | 30.49  | 0.000286                     |          |               | 0.625042 |
| PBS#1 (1)          | 16.04      | 21.76  | 0.019573                     | 0.019438 | 0.012941      | 42.72547 |
| PBS#1 (2)          | 16.13      | 21.78  | 0.019303                     |          |               | 42.13726 |
| PBS#2 (1)          | 16.12      | 22.79  | 0.010273                     | 0.010566 |               | 22.42482 |
| PBS#2 (2)          | 16.25      | 22.71  | 0.010859                     |          |               | 23.70344 |
| PBS#3 (1)          | 16.77      | 23.69  | 0.008759                     | 0.00882  |               | 19.12018 |
| PBS#3 (2)          | 16.94      | 23.67  | 0.008881                     |          |               | 19.38709 |
| ES-MSC#1 (1)       | 16.82      | 25.99  | 0.001791                     | 0.001804 | 0.00872       | 3.909609 |
| ES-MSC#1 (2)       | 16.91      | 25.97  | 0.001816                     |          |               | 3.964186 |
| ES-MSC#2 (1)       | 16.79      | 24.8   | 0.003839                     | 0.003866 |               | 8.380431 |
| ES-MSC#2 (2)       | 16.76      | 24.78  | 0.003893                     |          |               | 8.497418 |
| ES-MSC#3 (1)       | 16.49      | 22.7   | 0.019709                     | 0.02049  |               | 43.02265 |
| ES-MSC#3 (2)       | 17.58      | 22.59  | 0.021271                     |          |               | 46.43126 |
| ES-MSC-Fibro#1 (1) | 16.25      | 24.12  | 0.004364                     | 0.004349 | 0.005166      | 9.527017 |
| ES-MSC-Fibro#1 (2) | 16.31      | 24.13  | 0.004334                     |          |               | 9.461209 |
| ES-MSC-Fibro#2 (1) | 17.91      | 25.33  | 0.005983                     | 0.005983 |               | 13.05947 |
| ES-MSC-Fibro#2 (2) | 17.98      | 25.33  | 0.005983                     |          |               | 13.05947 |

C

| Group              | $\beta$ -actin Ct | IL12 $\beta$ Ct | $2^{-(\text{Avg. } \beta\text{-actin Ct} - \text{IL12}\beta \text{ Ct})}$ | Average  | Group Average | Value    |
|--------------------|-------------------|-----------------|---------------------------------------------------------------------------|----------|---------------|----------|
| NT#1 (1)           | 19.78             | 35              | 0.000027                                                                  | 0.000041 | 0.000036      | 0.745899 |
| NT#1 (2)           | 19.83             | 33.97           | 0.000054                                                                  |          |               | 1.523145 |
| NT#2 (1)           | 18.7              | 33.51           | 0.000035                                                                  | 0.000031 |               | 0.987637 |
| NT#2 (2)           | 18.74             | 33.92           | 0.000027                                                                  |          |               | 0.743319 |
| PBS#1 (1)          | 16.04             | 30.62           | 0.000042                                                                  | 0.000045 | 7.78E-05      | 1.178583 |
| PBS#1 (2)          | 16.13             | 30.42           | 0.000048                                                                  |          |               | 1.353836 |
| PBS#2 (1)          | 16.12             | 30.11           | 0.000064                                                                  | 0.000067 |               | 1.798823 |
| PBS#2 (2)          | 16.25             | 30.01           | 0.000069                                                                  |          |               | 1.92793  |
| PBS#3 (1)          | 16.77             | 29.83           | 0.000124                                                                  | 0.000122 |               | 3.475096 |
| PBS#3 (2)          | 16.94             | 29.89           | 0.000119                                                                  |          |               | 3.333535 |
| ES-MSC#1 (1)       | 16.82             | 30.88           | 0.000060                                                                  | 0.000065 | 9.05E-05      | 1.690035 |
| ES-MSC#1 (2)       | 16.91             | 30.68           | 0.000069                                                                  |          |               | 1.94134  |
| ES-MSC#2 (1)       | 16.79             | 30.21           | 0.000090                                                                  | 0.000095 |               | 2.526347 |
| ES-MSC#2 (2)       | 16.76             | 30.06           | 0.000100                                                                  |          |               | 2.803158 |
| ES-MSC#3 (1)       | 16.49             | 30.01           | 0.000124                                                                  | 0.000112 |               | 3.475096 |
| ES-MSC#3 (2)       | 17.58             | 30.34           | 0.000099                                                                  |          |               | 2.764566 |
| ES-MSC-Fibro#1 (1) | 16.25             | 30.77           | 0.000043                                                                  | 0.000044 | 4.27E-05      | 1.215924 |
| ES-MSC-Fibro#1 (2) | 16.31             | 30.74           | 0.000044                                                                  |          |               | 1.241473 |
| ES-MSC-Fibro#2 (1) | 17.91             | 32.22           | 0.000050                                                                  | 0.000041 |               | 1.411328 |
| ES-MSC-Fibro#2 (2) | 17.98             | 32.86           | 0.000032                                                                  |          |               | 0.905667 |

Fig4C

a

|                       | NT  | PBS                  | POS(NT)/<br>POS(PBS)*PBS | ES-MS               | POS(NT)/<br>POS(ES)*ES | ES-MS-Fib            | POS(NT)/<br>POS(Fib)*Fib |
|-----------------------|-----|----------------------|--------------------------|---------------------|------------------------|----------------------|--------------------------|
| KC (CXCL1)            | 17  | 238                  | 335.5300699              | 148                 | 228.809816             | 151                  | 157.8921162              |
|                       | 26  | 235                  | 331.3006993              | 158                 | 244.2699387            | 156                  | 163.120332               |
| TIMP-1                | 12  | 66                   | 93.04615385              | 28                  | 43.28834356            | 62                   | 64.82987552              |
|                       | 22  | 52                   | 73.30909091              | 30                  | 46.3803681             | 40                   | 41.82572614              |
| LIX                   | 87  | 231                  | 325.6615385              | 165                 | 255.0920245            | 212                  | 221.6763485              |
|                       | 79  | 220                  | 310.1538462              | 165                 | 255.0920245            | 207                  | 216.4481328              |
| MIP-1 alpha (CCL3)    | -   | 57                   | 80.35804196              | 45                  | 69.57055215            | 47                   | 49.14522822              |
|                       | -   | 50                   | 70.48951049              | 36                  | 55.65644172            | 39                   | 40.78008299              |
| Positive average(POS) | 168 | 119.1666667          |                          | 108.6666667         |                        | 160.6666667          |                          |
|                       |     | POS(NT)/<br>POS(PBS) |                          | POS(NT)/<br>POS(ES) |                        | POS(NT)/<br>POS(Fib) |                          |
|                       |     | 1.40979021           |                          | 1.54601227          |                        | 1.045643154          |                          |

b

|                           | NT       | PBS                  | POS(NT)/<br>POS(PBS)*PBS | ES-MS               | POS(NT)/<br>POS(PBS)*ES | ES-MS-Fib            | POS(NT)/<br>POS(PBS)*Fib |
|---------------------------|----------|----------------------|--------------------------|---------------------|-------------------------|----------------------|--------------------------|
| IL-6                      | -        | 0.001                | 0.001548352              | 0.0008111           | 0.000905385             | -                    | -                        |
|                           | -        | 0.0009778            | 0.001513979              | 0.0009778           | 0.001091463             | -                    | -                        |
| Positive average<br>(POS) | 0.000889 | 0.000574             |                          | 0.000796            |                         | 0.000470             |                          |
|                           |          | POS(NT)/<br>POS(PBS) |                          | POS(NT)/<br>POS(ES) |                         | POS(NT)/<br>POS(Fib) |                          |
|                           |          | 1.548352446          |                          | 1.116243538         |                         | 1.889766849          |                          |



**Fig4D**

|      | Group           | Area(%) | Average |
|------|-----------------|---------|---------|
| CD31 | NT(1)           | 15.718  | 16.383  |
|      | NT(2)           | 19.662  |         |
|      | NT(3)           | 17.929  |         |
|      | NT(4)           | 12.223  |         |
|      | PBS(1)          | 4.675   | 3.8753  |
|      | PBS(2)          | 4.814   |         |
|      | PBS(3)          | 3.788   |         |
|      | PBS(4)          | 2.224   |         |
|      | ES-MSC(1)       | 10.318  | 10.5405 |
|      | ES-MSC(2)       | 11.003  |         |
|      | ES-MSC(3)       | 10.055  |         |
|      | ES-MSC(4)       | 10.786  |         |
|      | ES-MSC-Fibro(1) | 15.4    | 14.4075 |
|      | ES-MSC-Fibro(2) | 12.796  |         |
|      | ES-MSC-Fibro(3) | 16.569  |         |
|      | ES-MSC-Fibro(4) | 12.865  |         |

**Fig4E**

|       | Group           | Area(%) | Average |
|-------|-----------------|---------|---------|
| VEGFA | NT(1)           | 4.51    | 4.89    |
|       | NT(2)           | 5.18    |         |
|       | NT(3)           | 4.98    |         |
|       | PBS(1)          | 1       | 0.7967  |
|       | PBS(2)          | 0.55    |         |
|       | PBS(3)          | 0.84    |         |
|       | ES-MSC(1)       | 4.51    | 3.6967  |
|       | ES-MSC(2)       | 3.44    |         |
|       | ES-MSC(3)       | 3.14    |         |
|       | ES-MSC-Fibro(1) | 8.27    | 8.7667  |
|       | ES-MSC-Fibro(2) | 9.37    |         |
|       | ES-MSC-Fibro(3) | 8.66    |         |

Supplementary Figure 3

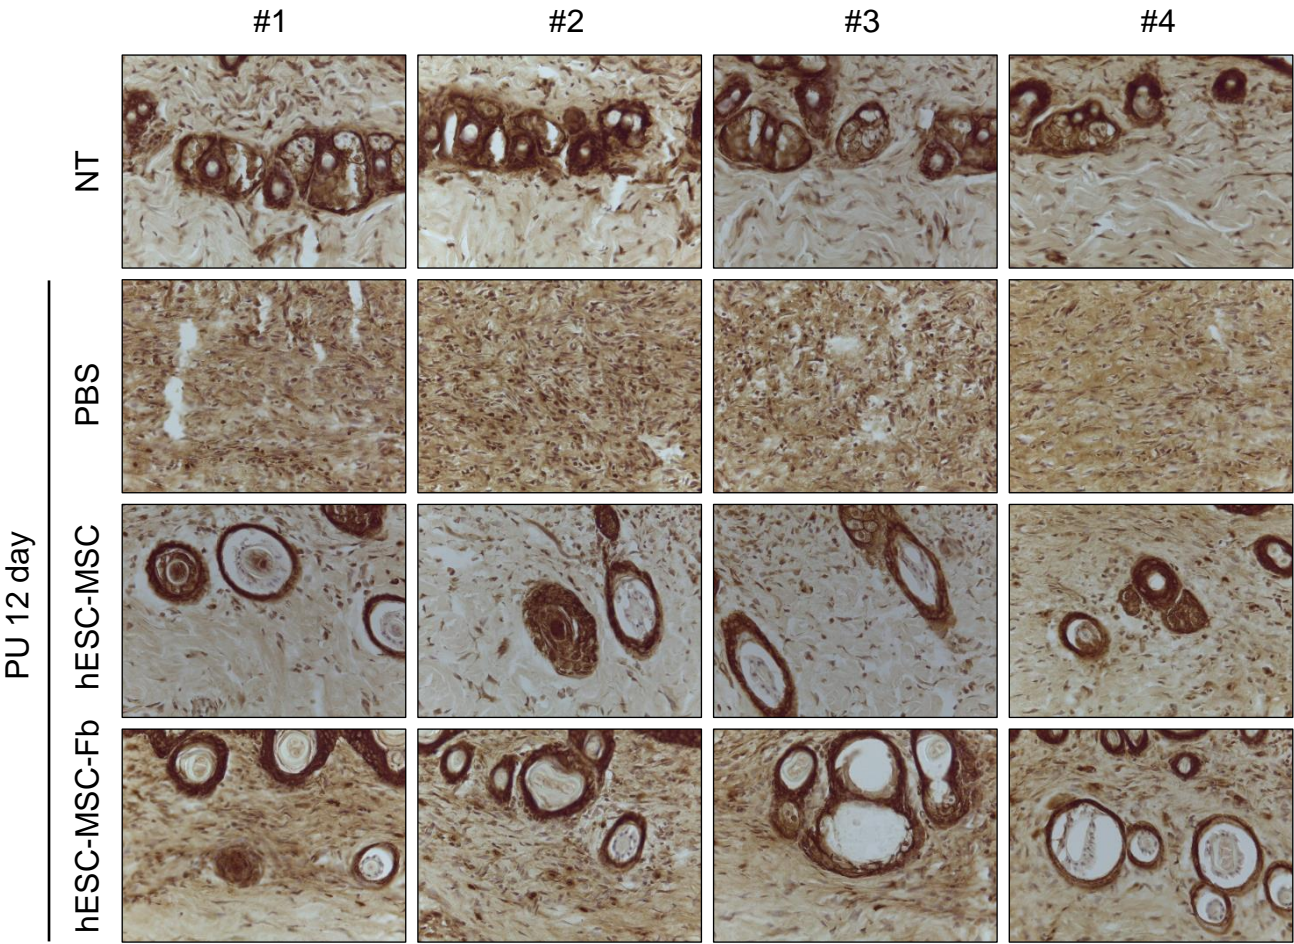

Supplement: f1 [file 4789568.f1.pdf]
